# Supplementary material
Source: MDPI journal article supplement (https://www.mdpi.com/2073-4344/14/3/186)
Supplement: s1 [file s1]

Supporting Information

# Perovskite-Derivative Ni-Based Catalysts for Hydrogen Production via Steam Reforming of Long-Chain Hydrocarbon Fuel

Kai Guo <sup>\*,†</sup>, Hui Zhang <sup>†</sup>, Changxuan Zhang, Xining Guo, Huiying Li and Zhouong Xiao <sup>\*</sup>

State Key Laboratory of Metastable Materials Science and Technology (MMST), Hebei Key Laboratory of Applied Chemistry, Yanshan University, Qinhuangdao 066004, China

<sup>\*</sup> Correspondence: kguo@ysu.edu.cn (K.G.); xiaozhourong1234@163.com (Z.X.);

Tel./Fax: +86-033-589-2340 (Z.X.)

<sup>†</sup> These authors contributed equally to this work.

## Contents

- i. Figure S1.** The schematic diagram of experimental apparatus.
- ii. Figure S2.** (a) TEM images and (b) HRTEM images of  $\text{LaNiO}_3$ . (c) TEM images and (d) HRTEM images of  $\text{LaCePrNiO}_3$ , (e) The element mapping of Ce and (f) Pr of  $\text{LaCePrNiO}_3$  after hydrogen reduction.
- iii. Figure S3.** XPS spectra of the catalysts after reduction for (a) Ce-3d, and (b) Pr-3d.
- iv. Figure S4.** SEM images of spent catalysts for (a)  $\text{LaNiO}_3$ , and (b)  $\text{LaCePrNiO}_3$ .

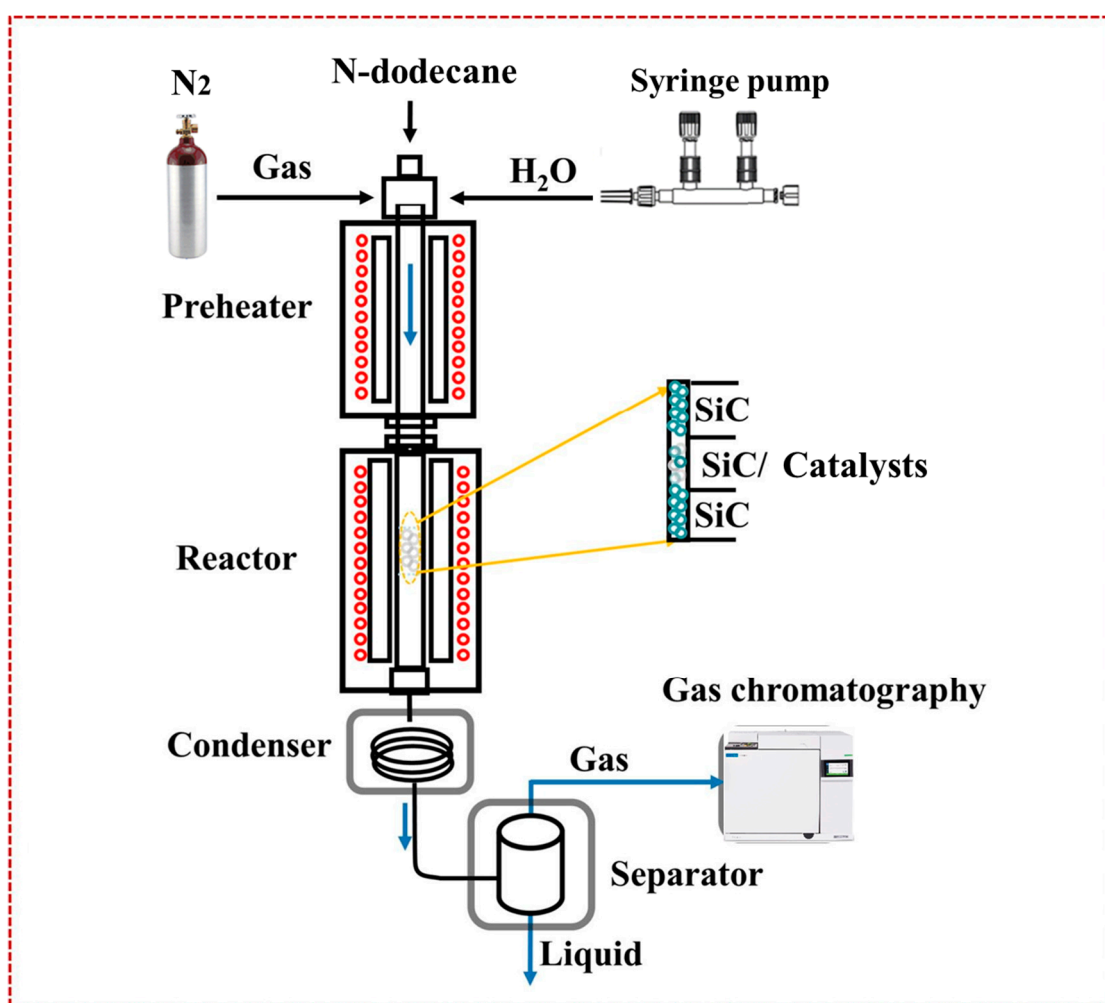

**Figure S1.** The schematic diagram of experimental apparatus.

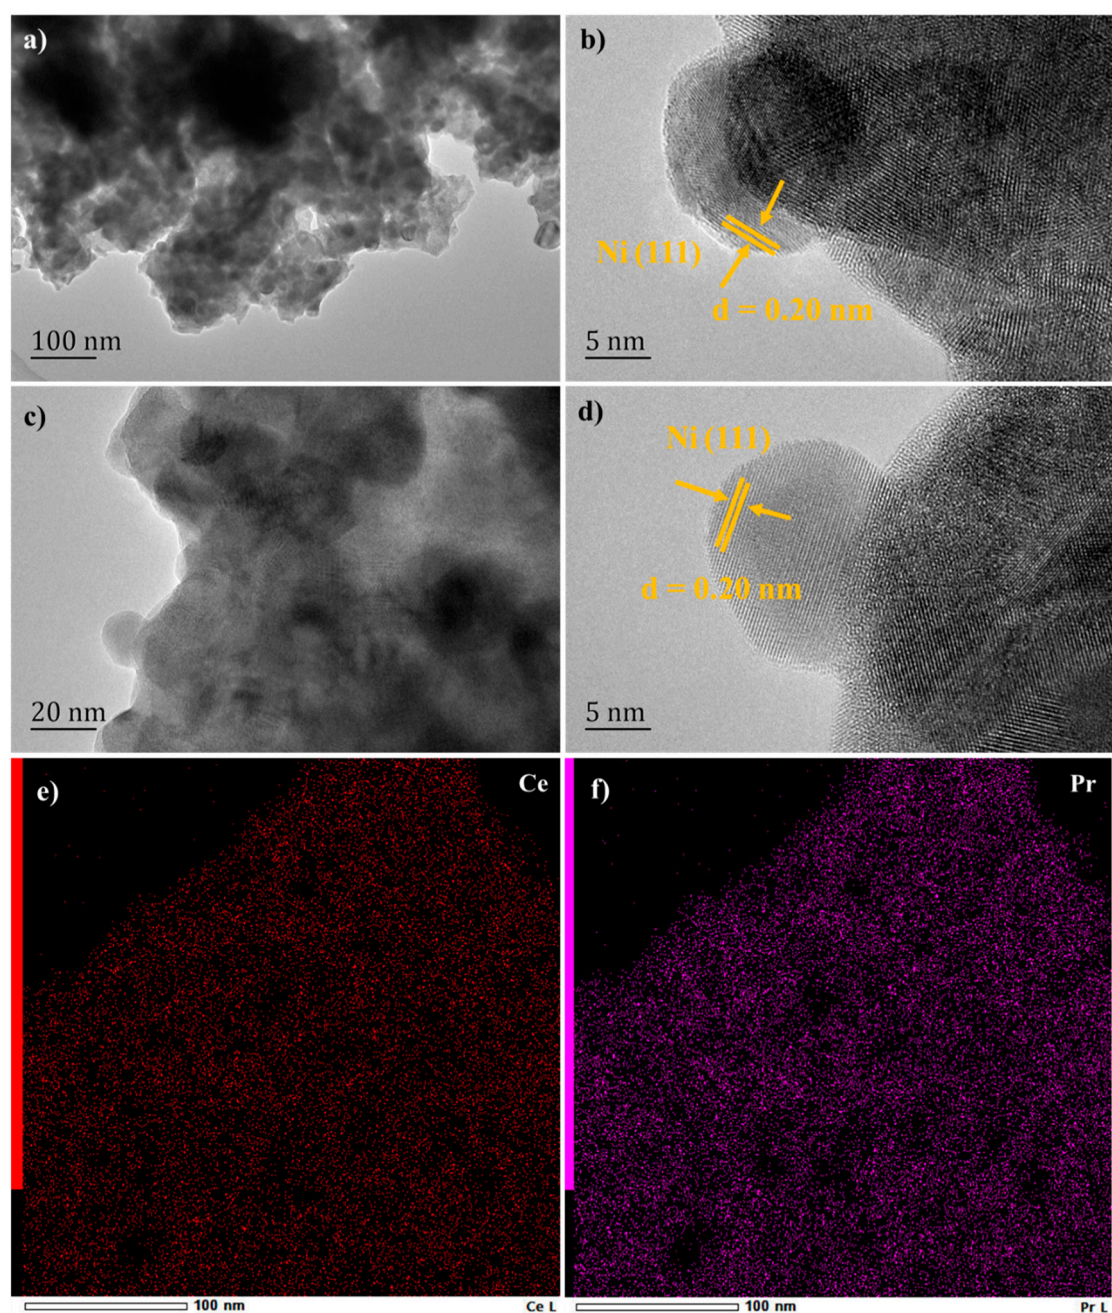

**Figure S2.** a) TEM images and b) HRTEM images of LaNiO<sub>3</sub>. c) TEM images and d) HRTEM images of LaCePrNiO<sub>3</sub>, e) The element mapping of Ce and f) Pr of LaCePrNiO<sub>3</sub> after hydrogen reduction.

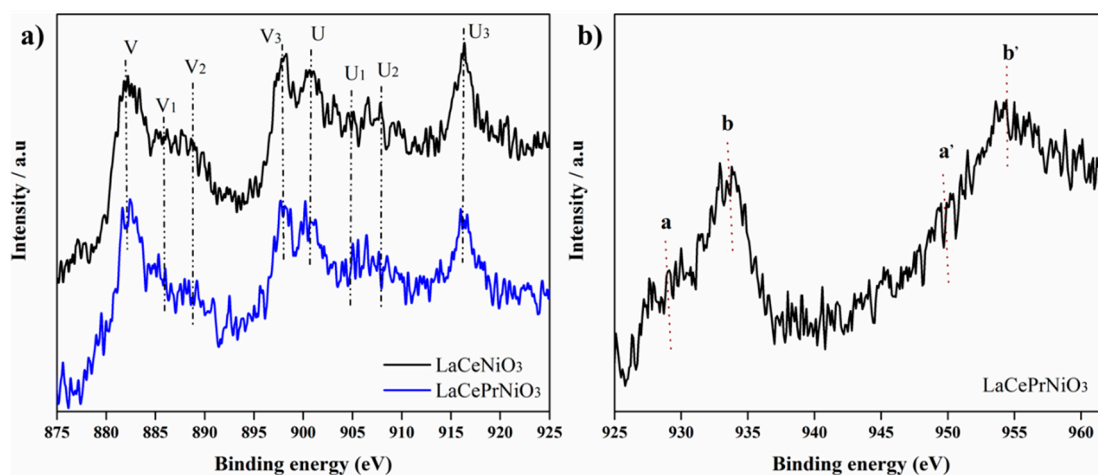

**Figure S3.** XPS spectra of the catalysts after reduction for a) Ce-3d, and b) Pr-3d.

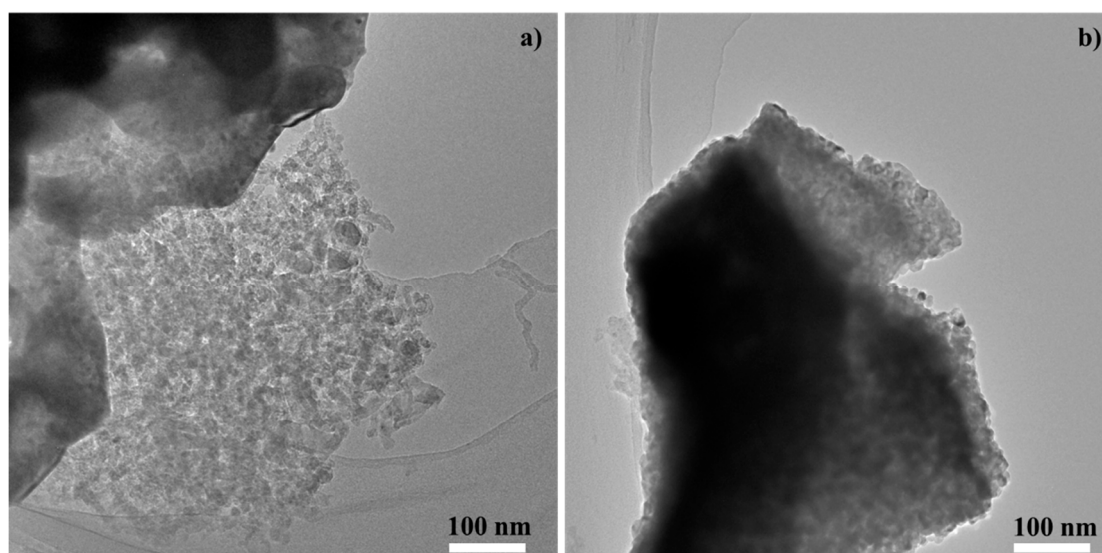

**Figure S4.** SEM images of spent catalysts for a) LaNiO<sub>3</sub>, and b) LaCePrNiO<sub>3</sub>. Reaction condition: 600 °C, 0.1 MPa, LHSV of C<sub>12</sub>H<sub>26</sub> 15 ml/g<sub>cat</sub>·h, with mole ratio of H<sub>2</sub>O:C<sub>12</sub>H<sub>26</sub> at 24.
